# Supplementary material
Source: PubMed Central journal article supplement (PMC1741032)
Supplement: oenvmed_62_6_363__1.pdf [file oenvmed_62_6_363__1.pdf]

## Appendix

The frequency (percentage of group total) of reporting to be regularly/often engaged in the activities and postures during work and time spent in physically demanding activities and vehicle driving during leisure time, in the group of construction workers and in the group of sedentary workers.

| <b>Work</b>                                | <b>Construction workers</b> |               | <b>Sedentary workers</b> |               |
|--------------------------------------------|-----------------------------|---------------|--------------------------|---------------|
|                                            | (n=47)                      |               | (n=49)                   |               |
|                                            | <i>freq</i>                 | (%)           | <i>freq</i>              | (%)           |
| sitting                                    | 3                           | (6.5)         | 44                       | (93.6)        |
| VDU operation                              | 1                           | (2.7)         | 36                       | (97.3)        |
| standing                                   | 41                          | (89.1)        | 1                        | (2.0)         |
| walking                                    | 34                          | (73.9)        | 0                        | (0)           |
| lifting/carrying loads (> 5kg)             | 42                          | (91.3)        | 0                        | (0)           |
| lifting/carrying heavy loads (> 25kg)      | 31                          | (67.4)        | 0                        | (0)           |
| pushing/pulling loads (>50kg)              | 16                          | (34.8)        | 0                        | (0)           |
| pushing/pulling heavy loads (>200kg)       | 5                           | (10.9)        | 0                        | (0)           |
| vehicle driving                            | 19                          | (41.3)        | 18                       | (36.7)        |
| postures                                   |                             |               |                          |               |
| kneeling / squatting                       | 20                          | (43.5)        | 0                        | (0)           |
| trunk flexion / rotation                   | 29                          | (63.0)        | 4                        | (8.2)         |
| uncomfortable posture                      | 21                          | (45.7)        | 1                        | (2.0)         |
| static posture                             | 22                          | (47.8)        | 29                       | (59.2)        |
| <b>leisure time</b>                        | <i>mean</i>                 | ( <i>SD</i> ) | <i>mean</i>              | ( <i>SD</i> ) |
| physical activities (hr.wk <sup>-1</sup> ) | 9.7                         | (7.1)         | 9.1                      | (5.6)         |
| vehicle driving (hr.wk <sup>-1</sup> )     | 6.9                         | (4.7))        | 7.0                      | (5.9)         |
